# Supplementary material for: High-Throughput Sequencing of Three Lemnoideae (Duckweeds) Chloroplast Genomes from Total DNA
Source: PLoS One. 2011 Sep 9;6(9):e24670. doi: 10.1371/journal.pone.0024670 (PMC3170387; doi:10.1371/journal.pone.0024670)
Supplement: Table S1 — Amplification primers for genome gap closure and validation. (XLS) [file pone.0024670.s001.xls]

## Sheet: Supplementary Table S1
Oligo name	Oligo sequence (5' to 3')
Sp_1_F	CACACAAACGATCACGTCCT
Sp_1_R	CACTTGAAGAAATGCAAGTGTGA
Sp_2_F	GTTCCGTACGCTCTTCCAGT
Sp_2_R	CCCAATTCCAAATTAGGAGAGA
Sp_3_F	CCTAATTTGGAATTGGGATTTT
Sp_3_R	GCCGGGGGAAGAAAATAAA
Sp_4_F	GTCCCTAGCTGGGCCATTAC
Sp_4_R	TTTTCCTTTCATGGTAAGTCGTT
Sp_5_F	TGCCTTAGATCTGGGACACA
Sp_5_R	GAAGCAGAAGCCCTTTTGAA
Sp_6_F	ATTTGGCTCTCACGCTTCAT
Sp_6_R	TCCAAGCACAACAAACATGG
Sp_7_F	ACACAACTCGCACACACTCC
Sp_7_R	ACAGCCAGAAGCAGAGGGTA
Sp_8_F	TGCCACAACCAGTCCATAAA
Sp_8_R	CCTTGGGCTTTGTCTGTGAT
Sp_9_F	ATCACAGACAAAGCCCAAGG
Sp_9_R	CATCCTAGAAGATTTCACAAAACC
Sp_10_F	ATTTTTGGTCCCAACGATCA
Sp_10_R	TGCATCCCAAACAACTTTCA
Sp_11_F	CAAGGGTTCTGCCAATTGAT
Sp_11_R	CCGCCTTTATCTCATTCCTG
Sp_12_F	TTTGTGTTCTGGGGTTTACATTT
Sp_12_R	GGGATTACTCAACCAGTTGTTTTT
Sp_13_F	GGTACAGGTTTAGGCCTTGTCA
Sp_13_R	AAGAATTGGAAATGCCATGC
Sp_14_F	GGGGGAGGAGTGGACTTTAG
Sp_14_R	CCCGAGTTATTGCGAAGAAA
Sp_15_F	TCCATGTACAATTTGAATGAGAA
Sp_15_R	CTATTGTTCCCGACCCCAAA
Sp_16_F	GCCCGACCACCATCATACTA
Sp_16_R	CAAATCCCACATAGATTTACGAA
Sp_17_F	TTTCGTAAATCTATGTGGGATTTG
Sp_17_R	GAGGGTCGACTTCTCCTATCC
Sp_18_F	TTTTTGCATCCTAGGCATTACT
Sp_18_R	AGCGGGTCTAACCAAGAAAA
Sp_19_F	CGGTTTATTGGAATCGGAAT
Sp_19_R	CGCTACAAGGTCCAGTTGGT
Sp_20_F	TCATGATGAACCCTGCAATG
Sp_20_R	GTGGTTCAAAAATGCCGAAT
Sp_21_F	GGATCCACTTGGATGGAACA
Sp_21_R	AGAACAGGCCATTCAACAGG
Sp_22_F	AGCTAAGCGGGCTCACATAA
Sp_22_R	CGGGATTTGGAATACTGGAA
Sp_23_F	GAGCCTTGGTATGGAAACCT
Sp_23_R	TTTGAGTCACCGATGGAAAA
Sp_24_F	CCGAGCATTTTATGTTTAGCC
Sp_24_R	GGTGGGATTGATTTTGAGTCTT
Sp_25_F	CAAATTCATCAAGACAGGTCTCA
Sp_25_R	TGAACTTTGTACCGCGCATA
Sp_26_F	AAAAGGCCCAGGGATTTCTA
Sp_26_R	CGAAAATTGAGATTGGCCTTA
Sp_27_F	CATTTCAGGTGAGACCCATAA
Sp_27_R	CTCCCTCCCATGAACTGAAA
Sp_28_F	AAAGGGTGTTCTGGGTGAGTT
Sp_28_R	ATTGCAAATGCCGGAAATAC
Sp_29_F	TGAGAGTTACCTCGGGAGCA
Sp_29_R	AAAGGCCTTCTTTAACCTCCA
Sp_30_F	CTCATGCTTCAAGGAAAGATCA
Sp_30_R	TGACAAGTTTTTCATTACCCAGA
Sp_31_F	GGAGAATACGAGGCAAAGGA
Sp_31_R	TCTTTTTGTTGCTCCCTTCTC
Sp_32_F	TCGCACTTTTTGGCTCTACC
Sp_32_R	TCGATCTAAACCAGCCCATT
Sp_33_F	AATGGAACCAATTCCCCATT
Sp_33_R	AAACACAAGCCGGAAAACAC
Sp_35_F	CGCGGAGGTATCTAGGGAAA
Sp_35_R	TGGAAATGGGAATGAAAAACA
Sp_36_F	CTCCTCGCGAGAAACAATTC
Sp_36_R	ACCCTGCGAATAAAGCAGAA
Sp_37_F	CTCCCTCTTCCACCAATGAA
Sp_37_R	TCTTCGTCGCCGTAAATAGG
Sp_38_F	ATCCGATCGCAACTACGAAT
Sp_38_R	AAATGGTTTCACGGGATTCA
Sp_39_F	CCGCTTAGCCCTATCTCCTT
Sp_39_R	GGATCCACTTTTTGGGGAAT
Sp_40_F	GATCGCCGGAATACTTCGTA
Sp_40_R	CATTCCATACCGGACCAGAC
Sp_41_F	CATCGGAACAATAGGGCTGT
Sp_41_R	GGGTCGAAATATGGCTTTCA
Sp_42_F	TTGTTTGCTCGCGATAATTG
Sp_42_R	CCCTATGAAATGAGGCATGG
Sp_43_F	TCTTCGAGCTTGGGTTATGG
Sp_43_R	GGATCCCTCTTCGTCCTGTT
Sp_44_F	GTCTGAAACCTTGGCGAAAA
Sp_44_R	TGTTTTGTCCAATTCGTGGA
Sp_45_F	TGAATCGGCGAAATCTTCTT
Sp_45_R	AGTAGCAGGAGGGCGAATCT
Sp_46_F	GGAAAAGACCACATACGACGA
Sp_46_R	TGTTAAACAAGGGATTGTCAGA
Sp_47_F	GAACGAACCGTTCTAAGCATT
Sp_47_R	ATCCTGGGATTTCGTGAACA
Sp_48_F	GTTCTCGTGGTCCAGAATCG
Sp_48_R	TATGCCGCTTCAACCTCTCT
Sp_49_F	GTCCATCGATTCCCAGTCTC
Sp_49_R	CGAGGACTGTGTCGGTTGTA
Sp_50_F	GACACCAGACGAATCAGTGG
Sp_50_R	TCGTCGATCTATCGTAACAGAAA
Sp_51_F	AACCATGCTTCGACTTGTGA
Sp_51_R	CATGGTACGGGATTATTTGGA
Sp_52_F	CCAATCCCAAAGAAAAAGCA
Sp_52_R	TTATGATCGCCACGAATTGA
Wl_1_F	AACACCTTTTGTCTGTCTCATCTG
Wl_1_R	CGATGTGGTAGAAAGCAACG
Wl_2_F	TCTTCGCTAAAGCCGTGTTC
Wl_2_R	AATGTAGCAACTCGGTAGAGCA
Wl_3_F	TGCTTTGACTTGAACACCAAA
Wl_3_R	TCAGAATGGTGCAAAATGGT
Wl_4_F	TGTTCAACCCCTAATCACAGAA
Wl_4_R	TCGGAAATATATTGGCTGATGA
Wl_5_F	AAGAAGATACTCGCTCGCTCA
Wl_5_R	GAAAAACTTTTCGTTTGGACTTT
Wl_6_F	ATCGACCCATGAAGAATCCA
Wl_6_R	CGAACCGGACCAAATCTAAA
Wl_7_F	TTTTTCTTCGGCATTTCTCC
Wl_7_R	TGTTTGTTTTTCGATTGGATG
Wl_8_F	TTTGATTTCATCAGGATTCAAAGA
Wl_8_R	TGTGTTAAGTCGCCTTGGTG
Wl_9_F	TGATCCTTTGGCTTTTCCAG
Wl_9_R	TGAAATGTTGAGTTGCTCTGTT
Wl_10_F	TCCCATAACCGAACGAACTT
Wl_10_R	TGGAACGGTCGATATTTCTTC
Wl_11_F	GAGGACTGAAAATCCTCGTGTC
Wl_11_R	TGAACTTTGTACCGCGCATA
Wl_12_F	TTTGAGGCAAACCCACATAA
Wl_12_R	CCTCCAAGCATTACCTTCTGAT
Wl_13_F	TTACATCTCAGGCGAGACTCA
Wl_13_R	GGTGATTTTCTCGCCGACTA
Wl_14_F	ACGGTTCACAAGCAGCTGAG
Wl_14_R	CGCGACTCTCACTAATTCCAG
Wl_15_F	GTTGATCCACGGATGGAGTT
Wl_15_R	TCCTTTATCATTTCGTCCAACA
Wl_16_F	GAGCCGACTACCTGGTCAAG
Wl_16_R	AGCAAGACCGTACCCTCAAA
Wl_17_F	TCTGACACAGCAACGCATTT
Wl_17_R	TTTGGGGTCCAACTCAATTC
Wl_18_F	GAATTGAGTTGGACCCCAAA
Wl_18_R	TCTCAATCAACCCATTTTGC
Wl_19_F	TATTCCCGGATGCCTTGTTA
Wl_19_R	CGACTGGGTGTATTGTGTCG
Wl_20_F	GCTAGAAACCTCTAAGACTAAGATGAG
Wl_20_R	ATGATTCATTGGGTGGGATG
Wl_21_F	TTCTCTTTGGTGAGTGCAGAAA
Wl_21_R	TGGCGGTGAAGCAATAAAAT
Wl_22_F	CGATCTCCACAGGACAGTCA
Wl_22_R	ATGGCGGCTTACTTGAGCTA
Wl_23_F	ATCTGGAGCAGTGTGGGCTA
Wl_23_R	CGCGATTGGTCTATATCCTGA
Wl_24_F	CCAATCCCAAAGAAAAAGCA
Wl_24_R	CTTATGATCGCCACGAATTG
Wl_25_F	GGGTTATCCTGCACTTGGAA
Wl_25_R	ATCAACCGTGCTAACCTTGG
Wl_26_F	TGCCTCCTTGAAAGAGAGATG
Wl_26_R	TGTGTGGTGGGGTTTGAGTA
Wl-27_F	TTTAGATTTGGTCCGGTTCG
Wl-27_R	GCGAAAGTTCGTCAAAAAGC
Wl-28_F	TTTAGATTTGGTCCGGTTCG
Wl-28_R	TTTTAGTCGCGAGGGATCAT
Wl-29_F	TACTCAAACCCCACCACACA
Wl-29_R	CGAACCGGACCAAATCTAAA
Wl-30_F	GAAAAGGGAATCGATCGTGA
Wl-30_R	ACAGCCAATTGGAAAGCAAT
Wl-31_F	GAAAAGGGAATCGATCGTGA
Wl-31_R	TCAATTCATATGGCCATGTTCT
Wl-32_F	GAGCCGACTACCTGGTCAAG
Wl-32_R	CCCGTTCGGAAGGCTACTAT
Wa_1_F	ATTCTTCGCTAAAGCCGTCA
Wa_1_R	TTTTGTATCCCGTTCCAATACA
Wa_2_F	CCTAGCTGGGCCGTTACTTT
Wa_2_R	GGTATTGCCTTTTTCCAGTCA
Wa_3_F	TTGTGTTGAGCGATCTACGTCT
Wa_3_R	TCCCGAGATAGATGAAAACTGT
Wa_4_F	CGACCCAGGAAGAATCCATA
Wa_4_R	AATGAATATTGAACCGAACCTAAT
Wa_5_F	ATTAGGTTCGGTTCAATATTCATTA
Wa_5_R	TCTTTGCTTTTGAGGGATCA
Wa_6_F	ATGCGTTTTTGGGATCTACG
Wa_6_R	TCGATTGGCGGGTAGATAAA
Wa_7_F	AGACATCAGGGGTTGACTCG
Wa_7_R	CGCCATGATGCATTTTCTC
Wa_8_F	GGGGATATGGCGAAATAGGT
Wa_8_R	TCACCGATGAAAAAGAGGAAA
Wa_9_F	CTGACACAGCAACGCATTTT
Wa_9_R	AGCAGGAAGCAATTGACCAT
Wa_10_F	GGTTCCTTTTGGACCTAACCA
Wa_10_R	AAGCATGAAACACCCAAAAA
Wa_11_F	CTCAGCGCTTTTCATTGGTT
Wa_11_R	TCCTCCTATGGGCAGTAACG
Wa_12_F	TGAATCGGCAAAATCCTCTT
Wa_12_R	AATTTCTGTCTTCTTTTTGAGTT
Wa_13_F	TCCCATTTGGAGTTGCATAA
Wa_13_R	TGGCGTTGTGAGTTTCTTTG
Wa_14_F	TGGTGCAGTATGGGCTAATG
Wa_14_R	TGTTACGGCAGATGTTCTATGG
Wa_15_F	CATGCTCAACCATCATTGACT
Wa_15_R	TGCAATTACTATGGCTCGTCA
Wa_16_F	TGGCTAGGTAAGCGTCCTGT
Wa_16_R	ATCAACCGTGCTAACCTTGG
